# Supplementary material for: Ultrasonography Findings of the Carpal Tunnel after Endoscopic Carpal Tunnel Release for Carpal Tunnel Syndrome
Source: PubMed Central journal article supplement — Korean J Radiol. 2021 May 4;22(7):1132–41. doi: 10.3348/kjr.2020.1039 (PMC8236373; doi:10.3348/kjr.2020.1039), 2021-05-04
Supplement: kjr-22-1132-s001.pdf [file kjr-22-1132-s001.pdf]

## SUPPLEMENT

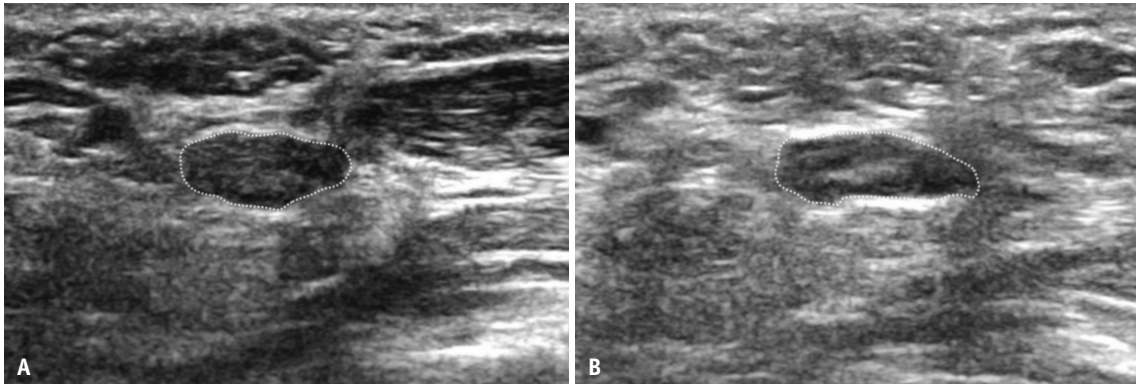

**Supplementary Fig. 1. Transverse ultrasound of the same patient as figure 1 shows the median nerve distal to the carpal tunnel at baseline (A) and 12 months (B) post-endoscopic carpal tunnel release. Median nerve cross sectional areas (dotted lines) at baseline (25.3 mm<sup>2</sup>) and 12 months (27.0 mm<sup>2</sup>) are similar.**
