# Supplementary material for: Ultrasonography Findings of the Carpal Tunnel after Endoscopic Carpal Tunnel Release for Carpal Tunnel Syndrome
Source: PubMed Central journal article supplement — Korean J Radiol. 2021 May 4;22(7):1132–41. doi: 10.3348/kjr.2020.1039 (PMC8236373; doi:10.3348/kjr.2020.1039), 2021-05-04
Supplement: kjr-22-1132-s002.pdf [file kjr-22-1132-s002.pdf]

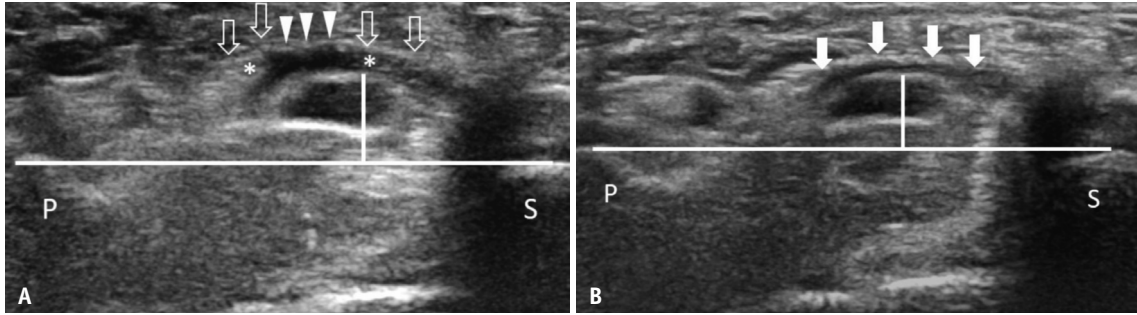

**Supplementary Fig. 2. Transverse ultrasound shows the median nerve at the carpal tunnel inlet in a patient with a clinical improvement score of 2 at one month (A) and at 12 months (B) post-ECTR. A.** Tangential line drawn between the S and P is shown. The palmar bowing of the flexor retinaculum is measured by drawing a line perpendicular to the tangential line (white vertical line) connecting the highest point of the undersurface of the flexor retinaculum (open arrows). At 1-month follow-up post-ECTR, there is a well-defined gap (arrowheads) filled with fluid between the torn, retracted ends of the flexor retinaculum (asterisks). **B.** At 12 months, there is slightly less volar bowing and the flexor retinaculum has reformed (solid arrows)[. ECTR = endoscopic carpal tunnel release, P = pisiform, S = scaphoid
